# Supplementary material for: Stability and bonding of the multiply coordinated bimetallic boron cycles: B8M22−, B7NM2and B6C2M2with M = Sc and Ti
Source: Royal Society of Chemistry journal article supplement (doi:10.1039/c6ra04948f), 2016-01-01
Supplement: c6ra04948f1.pdf [file c6ra04948f1.pdf]

## Supplementary Information

### **Stability and bonding of the multiply coordinated bimetallic boron cycles: $B_8M_2^{2-}$ , $B_7NM_2$ and $B_6C_2M_2$ with $M = Sc$ and $Ti$**

Hung Tan Pham,<sup>a,b</sup> Nguyen Minh Tam,<sup>c</sup> My Phuong Pham-Ho<sup>d</sup> and  
Minh Tho Nguyen<sup>e,\*</sup>

<sup>a</sup> *Computational Chemistry Research Group, Ton Duc Thang University, Ho Chi Minh City, Vietnam, Vietnam*

<sup>b</sup> *Faculty of Applied Sciences, Ton Duc Thang University, Ho Chi Minh City, Vietnam*

<sup>c</sup> *Institute for Computational Science and Technology (ICST), Ho Chi Minh City, Vietnam*

<sup>d</sup> *Faculty of Chemical Engineering, Ho Chi Minh City University of Technology, Vietnam*

<sup>e</sup> *Department of Chemistry, University of Leuven, B-3001 Leuven, Belgium.*

<sup>\*</sup> *Email: minh.nguyen@chem.kuleuven.be*

The file contains:

**Figure S1.** The ring current maps of  $\pi$ -MOs of  $B_8Sc_2^{2-}$ ,  $B_7NSc_2$  and  $B_6C_2Sc_2$  clusters.

**Figure S2.** The ring current maps of  $\sigma$ -MOs of  $B_8Sc_2^{2-}$ ,  $B_7NSc_2$  and  $B_6C_2Sc_2$  clusters.

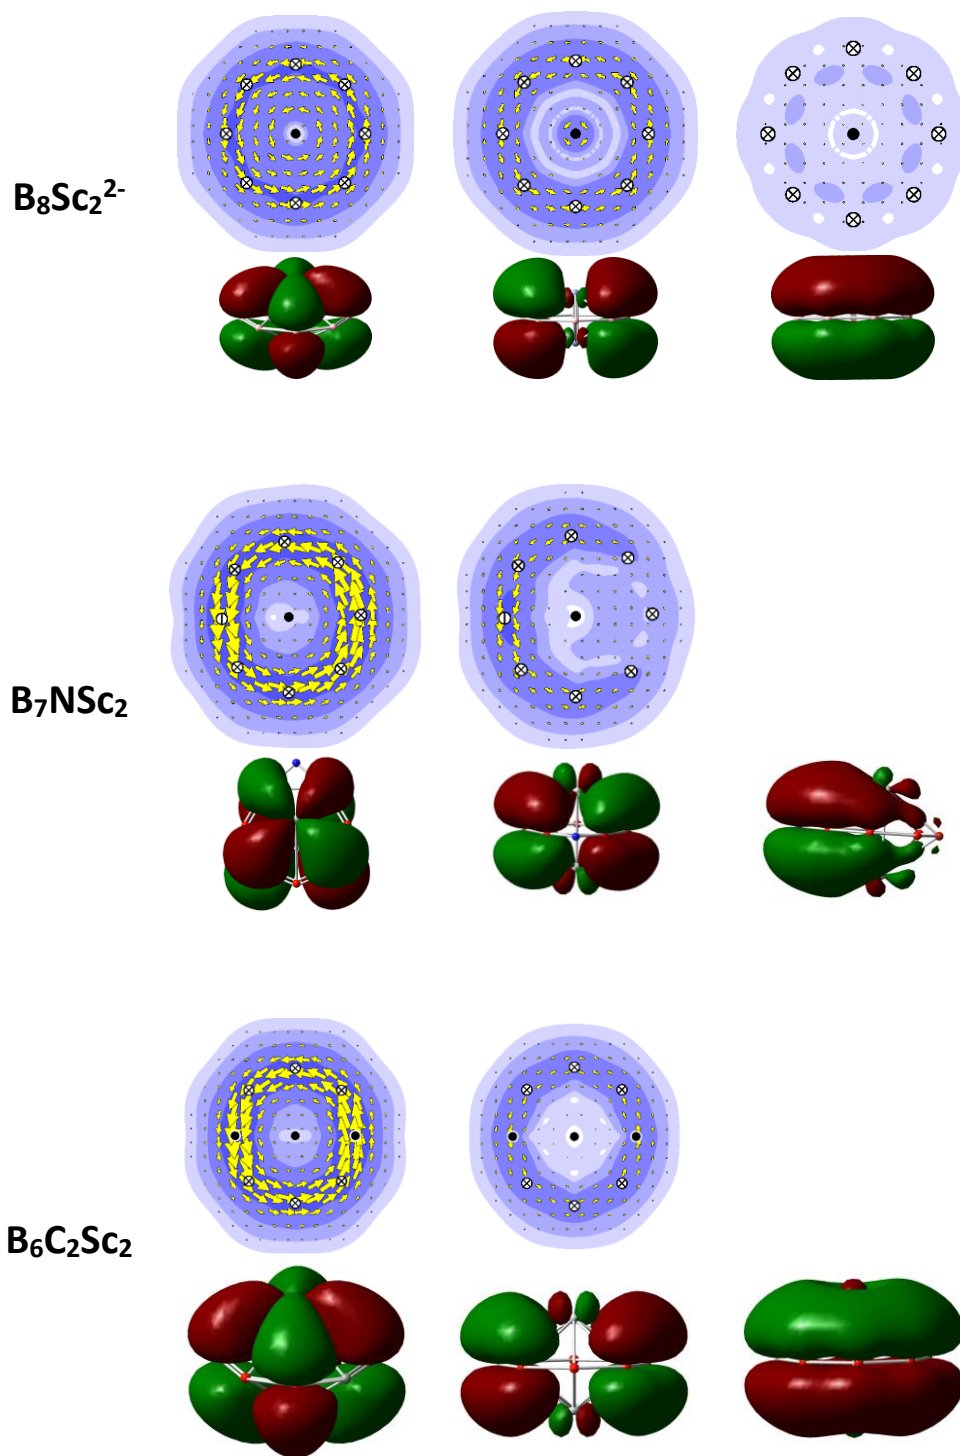

**Figure S1**

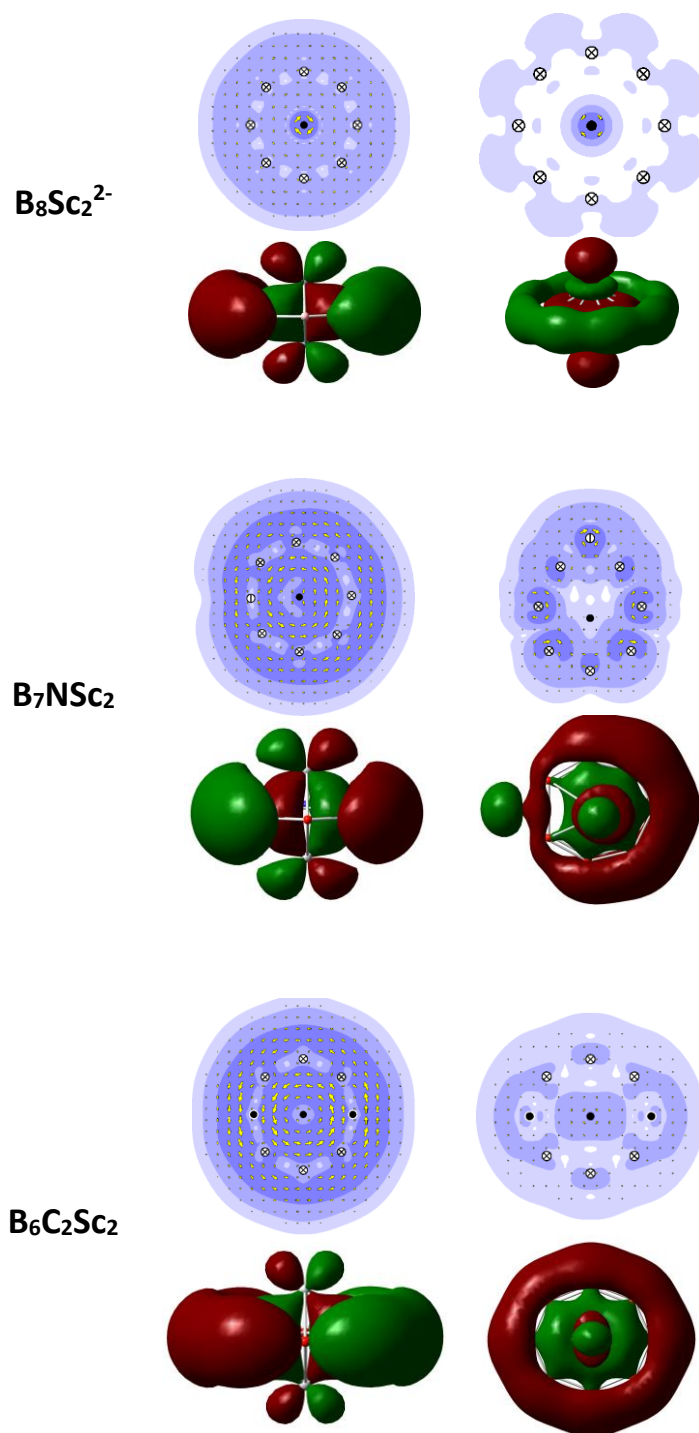

Figure S2
